# Supplementary material for: Isolation of soil bacteria able to degrade the anthelminthic compound albendazole
Source: PeerJ. 2023 Nov 6;11:e16127. doi: 10.7717/peerj.16127 (PMC10634332; doi:10.7717/peerj.16127)
Supplement: Supplemental Information 1 [file peerj-11-16127-s001.xlsx]

## Sheet: 1st Cycle
				ABZ	ABZSO	ABZSO2	ABZ	ABZSO	ABZSO2	ABZ	ABZSO	ABZSO2	ABZ	ABZSO	ABZSO2	ABZ	ABZSO	ABZSO2	ABZ	ABZSO	ABZSO2	ABZ	ABZSO	ABZSO2
Time	Sampling day	ΤΡΕΑΤ.	REP	HPLC (mg/L)	HPLC (mg/L)	HPLC (mg/L)	In medium (ug/ml)	In medium (ug/ml)	In medium (ug/ml)	AV	AV	AV	STDEV	STDEV	STDEV	%	%	%	% Average	% Average	% Average	STDEV	STDEV	STDEV
T0	0	MSM + ABZ + Inoc.	a	1.439	0	0	2.878	0	0	3.03467	0	0	0.136122	0	0	94.8374	0	0	100	0	0	4.48558	0	0
		MSM + ABZ + Inoc.	b	1.551	0	0	3.102	0	0							102.219	0	0
		MSM + ABZ + Inoc.	c	1.562	0	0	3.124	0	0							102.944	0	0
		MSMN + ABZ + Inoc.	a	1.7865	0	0	3.573	0	0	3.573	0	0	0.349	0	0	100	0	0	100	0	0	9.7677	0	0
		MSMN + ABZ + Inoc.	b	1.961	0	0	3.922	0	0							109.768	0	0
		MSMN + ABZ + Inoc.	c	1.612	0	0	3.224	0	0							90.2323	0	0
		MSM + ABZ + Control		2.689	0	0	5.378	0	0	5.378						100	0	0
		MSMN + ABZ + Control		2.727	0	0	5.454	0	0	5.454						100	0	0
T5	5	MSM + ABZ + Inoc.	a	0.365	1.016	0.119	0.73	2.032	0.238	0.784	2.05267	0.220667	0.0987725	0.0411015	0.0155349	24.0554	66.9596	7.84271	25.8348	67.6406	7.27153	3.2548	1.3544	0.511915
		MSM + ABZ + Inoc.	b	0.449	1.05	0.104	0.898	2.1	0.208							29.5914	69.2004	6.85413
		MSM + ABZ + Inoc.	c	0.362	1.013	0.108	0.724	2.026	0.216							23.8576	66.7619	7.11775
		MSMN + ABZ + Inoc.	a	0.293	1.131	0.103	0.586	2.262	0.206	0.65	2.334	0.226	0.0802247	0.0623859	0.0210713	16.4008	63.3081	5.76546	18.192	65.3233	6.32522	2.2453	1.74604	0.589737
		MSMN + ABZ + Inoc.	b	0.312	1.186	0.112	0.624	2.372	0.224							17.4643	66.3868	6.26924
		MSMN + ABZ + Inoc.	c	0.37	1.184	0.124	0.74	2.368	0.248							20.7109	66.2748	6.94095
		MSM + ABZ + Control		2.203	0.108	0	4.406	0.216	0	4.406						81.9264	4.01636	0
		MSMN + ABZ + Control		2.4	0.106	0	4.8	0.212	0	4.8						88.0088	3.88706	0

## Sheet: 2nd Cycle
				ABZ	ABZSO	ABZSO2	ABZ	ABZSO	ABZSO2	ABZ	ABZSO	ABZSO2	ABZ	ABZSO	ABZSO2	ABZ	ABZSO	ABZSO2	ABZ	ABZSO	ABZSO2	ABZ	ABZSO	ABZSO2
Time	Sampling day	ΤΡΕΑΤ.	REP	HPLC (mg/L)	HPLC (mg/L)	HPLC (mg/L)	In medium (ug/ml)	In medium (ug/ml)	In medium (ug/ml)	AV	AV	AV	STDEV	STDEV	STDEV	%	%	%	% Average	% Average	% Average	STDEV	STDEV	STDEV
T0	0	MSM + ABZ + Inoc.	a	2.771	0	0	5.542	0	0	5.586	0	0	0.044	0	0	99.2123	0	0	100	0	0	0.787683	0	0
		MSM + ABZ + Inoc.	b	2.815	0	0	5.63	0	0							100.788	0	0
		MSM + ABZ + Inoc.	c	2.793	0	0	5.586	0	0							100	0	0
		MSMN + ABZ + Inoc.	a	2.725	0	0	5.45	0	0	5.684	0	0	0.234	0	0	95.8832	0	0	100	0	0	4.11682	0	0
		MSMN + ABZ + Inoc.	b	2.959	0	0	5.918	0	0							104.117	0	0
		MSMN + ABZ + Inoc.	c	2.842	0	0	5.684	0	0							100	0	0
		MSM + ABZ + Control		2.904	0	0	5.808	0	0	5.808						100	0	0
		MSMN + ABZ + Control		2.95	0	0	5.9	0	0	5.9						100	0	0
T4	4	MSM + ABZ + Inoc.	a	1.2775	0.141	0	2.555	0.282	0	2.555	0.282	0	0.111	0.01	0	45.7393	5.04834	0	45.7393	5.04834	0	1.98711	0.179019	0
		MSM + ABZ + Inoc.	b	1.333	0.136	0	2.666	0.272	0							47.7265	4.86932	0
		MSM + ABZ + Inoc.	c	1.222	0.146	0	2.444	0.292	0							43.7522	5.22735	0
		MSMN + ABZ + Inoc.	a	1.332	0.124	0	2.664	0.248	0	2.33667	0.400667	0	0.283777	0.213001	0	46.8684	4.36312	0	41.1095	7.04903	0	4.99256	3.74737	0
		MSMN + ABZ + Inoc.	b	1.093	0.155	0	2.186	0.31	0							38.4588	5.45391	0
		MSMN + ABZ + Inoc.	c	1.08	0.322	0	2.16	0.644	0							38.0014	11.33	0
		MSM + ABZ + Control		2.715	0.098	0	5.43	0.196	0	5.43						93.4917	3.37466	0
		MSMN + ABZ + Control		2.845	0.103	0	5.69	0.206	0	5.69						96.4407	3.49153	0
T6	4	MSM + ABZ + Inoc.	a	0.833	0.14	0.012	1.666	0.28	0.024	1.584	0.301333	0.0406667	0.14901	0.0220303	0.0194251	29.8246	5.01253	0.429646	28.3566	5.39444	0.728011	2.66756	0.394384	0.347746
		MSM + ABZ + Inoc.	b	0.837	0.15	0.031	1.674	0.3	0.062							29.9678	5.37057	1.10992
		MSM + ABZ + Inoc.	c	0.706	0.162	0.018	1.412	0.324	0.036							25.2775	5.80021	0.644468
		MSMN + ABZ + Inoc.	a	0.534	0.176	0.048	1.068	0.352	0.096	1.024	0.495333	0.0593333	0.0977343	0.181927	0.0370045	18.7896	6.19282	1.68895	18.0155	8.71452	1.04387	1.71946	3.20068	0.651029
		MSMN + ABZ + Inoc.	b	0.456	0.217	0.03	0.912	0.434	0.06							16.045	7.63547	1.05559
		MSMN + ABZ + Inoc.	c	0.546	0.35	0.011	1.092	0.7	0.022							19.2118	12.3153	0.387051
		MSM + ABZ + Control		2.604	0.114	0	5.208	0.228	0	5.208						89.6694	3.92562	0
		MSMN + ABZ + Control		2.484	0.116	0.012	4.968	0.232	0.024	4.968						84.2034	3.9322	0.40678

## Sheet: 3rd Cycle
				ALB	ALBSO	ALBSO2	ALB	ALBSO	ALBSO2	ALB	ALBSO	ALBSO2	ALB	ALBSO	ALBSO2	ALB	ALBSO	ALBSO2	ALB	ALBSO	ALBSO2	ALB	ALBSO	ALBSO2
Time	Sampling day	ΤΡΕΑΤ.	REP	HPLC (mg/L)	HPLC (mg/L)	HPLC (mg/L)	In medium (ug/ml)	In medium (ug/ml)	In medium (ug/ml)	AV	AV	AV	STDEV	STDEV	STDEV	%	%	%	% Average	% Average	% Average	STDEV	STDEV	STDEV
T0	0	MSM + ABZ + Inoc.	a	2.707	0	0	5.414	0	0	5.364	0	0	0.0458258	0	0	100.932	0	0	100	0	0	0.854321	0	0
		MSM + ABZ + Inoc.	b	2.677	0	0	5.354	0	0							99.8136	0	0
		MSM + ABZ + Inoc.	c	2.662	0	0	5.324	0	0							99.2543	0	0
		MSMN + ABZ + Inoc.	a	2.679	0	0	5.358	0	0	5.35533	0	0	0.0380701	0	0	100.05	0	0	100	0	0	0.710882	0	0
		MSMN + ABZ + Inoc.	b	2.696	0	0	5.392	0	0							100.685	0	0
		MSMN + ABZ + Inoc.	c	2.658	0	0	5.316	0	0							99.2655	0	0
		MSM + ABZ + Control		2.78	0	0	5.56	0	0	5.56						100	0	0
		MSMN + ABZ + Control		2.77	0	0	5.54	0	0	5.54						100	0	0
T3	3	MSM + ABZ + Inoc.	a	1.558	0.13	0	3.116	0.26	0	2.81867	0.19	0	0.477399	0.06063	0	58.091	4.84713	0	52.5478	3.54213	0	8.90005	1.13031	0
		MSM + ABZ + Inoc.	b	1.134	0.078	0	2.268	0.156	0							42.2819	2.90828	0
		MSM + ABZ + Inoc.	c	1.536	0.077	0	3.072	0.154	0							57.2707	2.87099	0
		MSMN + ABZ + Inoc.	a	0.456	0.136	0.012	0.912	0.272	0.024	0.762667	0.294	0.0306667	0.137264	0.0269072	0.0151438	17.0298	5.07905	0.448151	14.2413	5.48985	0.572638	2.56312	0.502438	0.282779
		MSMN + ABZ + Inoc.	b	0.367	0.143	0.024	0.734	0.286	0.048							13.706	5.34047	0.896303
		MSMN + ABZ + Inoc.	c	0.321	0.162	0.01	0.642	0.324	0.02							11.988	6.05004	0.373459
		MSM + ABZ + Control		2.506	0.07	0	5.012	0.14	0	5.012						90.1439	2.51799	0
		MSMN + ABZ + Control		2.5322	0.102	0	5.0644	0.204	0	5.0644						91.4152	3.68231	0
T6	6	MSM + ABZ + Inoc.	a	0.852	0.148	0.012	1.704	0.296	0.024	1.43267	0.312667	0.0273333	0.352683	0.0472582	0.0057735	31.7673	5.51827	0.447427	26.7089	5.82898	0.50957	6.575	0.881025	0.107634
		MSM + ABZ + Inoc.	b	0.517	0.183	0.017	1.034	0.366	0.034							19.2767	6.82327	0.633855
		MSM + ABZ + Inoc.	c	0.78	0.138	0.012	1.56	0.276	0.024							29.0828	5.14541	0.447427
		MSM + ABZ + Control		2.432	0.108	0	4.864	0.216	0	4.864						87.482	3.88489	0

## Sheet: 4rth Cycle
				ALB	ALBSO	ALBSO2	ALB	ALBSO	ALBSO2	ALB	ALBSO	ALBSO2	ALB	ALBSO	ALBSO2	ALB	ALBSO	ALBSO2	ALB	ALBSO	ALBSO2	ALB	ALBSO	ALBSO2
Time	Sampling day	ΤΡΕΑΤ.	REP	HPLC (mg/L)	HPLC (mg/L)	HPLC (mg/L)	In medium (ug/ml)	In medium (ug/ml)	In medium (ug/ml)	AV	AV	AV	STDEV	STDEV	STDEV	%	%	%	% Average	% Average	% Average	STDEV	STDEV	STDEV
T0	0	MSM + ABZ + Inoc.	a	2.346	0	0	4.692	0	0	4.96333	0	0	0.24855	0	0	94.5332	0	0	100	0	0	5.00773	0	0
		MSM + ABZ + Inoc.	b	2.59	0	0	5.18	0	0							104.365	0	0
		MSM + ABZ + Inoc.	c	2.509	0	0	5.018	0	0							101.101	0	0
T0	0	MSMN + ABZ + Inoc.	a	2.554	0	0	5.108	0	0	5.23733	0	0	0.112077	0	0	97.5305	0	0	100	0	0	2.13997	0	0
		MSMN + ABZ + Inoc.	b	2.653	0	0	5.306	0	0							101.311	0	0
		MSMN + ABZ + Inoc.	c	2.649	0	0	5.298	0	0							101.158	0	0
		MSM + ABZ + Control		2.56	0	0	5.12	0	0	5.12						100	0	0
		MSMN + ABZ + Control		2.619	0	0	5.238	0	0	5.238						100	0	0
T3	3	MSM + ABZ + Inoc.	a	1.402	0.309	0	2.804	0.618	0	3.04533	0.478	0	0.209774	0.166421	0	56.4943	12.4513	0	61.3566	9.63062	0	4.22648	3.35301	0
		MSM + ABZ + Inoc.	b	1.592	0.147	0	3.184	0.294	0							64.1504	5.92344	0
		MSM + ABZ + Inoc.	c	1.574	0.261	0	3.148	0.522	0							63.4251	10.5171	0
T3	3	MSMN + ABZ + Inoc.	a	1.348	0.268	0.03	2.696	0.536	0.06	2.676	0.552667	0.0346667	0.420357	0.0306159	0.0220303	51.4766	10.2342	1.14562	51.0947	10.5524	0.661914	8.02616	0.58457	0.420639
		MSMN + ABZ + Inoc.	b	1.543	0.267	0.012	3.086	0.534	0.024							58.9231	10.196	0.458248
		MSMN + ABZ + Inoc.	c	1.123	0.294	0.01	2.246	0.588	0.02							42.8844	11.2271	0.381874
		MSM + ABZ + Control		2.299	0.194	0	4.598	0.388	0	4.598						89.8047	7.57813	0
		MSMN + ABZ + Control		2.522	0.167	0	5.044	0.334	0	5.044						96.2963	6.37648	0
T6	3	MSM + ABZ + Inoc.	a	0.573	0.385	0.035	1.146	0.77	0.07	0.991333	0.655333	0.0533333	0.158105	0.115001	0.0152753	23.0893	15.5138	1.41034	19.9731	13.2035	1.07455	3.18547	2.31702	0.307762
		MSM + ABZ + Inoc.	b	0.499	0.27	0.025	0.998	0.54	0.05							20.1075	10.8798	1.00739
		MSM + ABZ + Inoc.	c	0.415	0.328	0.02	0.83	0.656	0.04							16.7226	13.2169	0.80591
T5	3	MSMN + ABZ + Inoc.	a	0.434	0.3439	0.045	0.868	0.6878	0.09	0.884	0.731933	0.054	0.016	0.129757	0.0327414	16.5733	13.1326	1.71843	16.8788	13.9753	1.03106	0.305499	2.47753	0.625154
		MSMN + ABZ + Inoc.	b	0.442	0.315	0.023	0.884	0.63	0.046							16.8788	12.029	0.87831
		MSMN + ABZ + Inoc.	c	0.45	0.439	0.013	0.9	0.878	0.026							17.1843	16.7643	0.496436
		MSM + ABZ + Control		2.228	0.235	0	4.456	0.47	0	4.456						87.0312	9.17969	0
		MSMN + ABZ + Control		2.471	0.228	0	4.942	0.456	0	4.942						94.349	8.70561	0
