# Supplementary material for: Isolation of soil bacteria able to degrade the anthelminthic compound albendazole
Source: PeerJ. 2023 Nov 6;11:e16127. doi: 10.7717/peerj.16127 (PMC10634332; doi:10.7717/peerj.16127)
Supplement: Supplemental Information 2 [file peerj-11-16127-s002.xlsx]

## Sheet: 1st cultivation
	ABZ	ABZSO	ABZSO2	ABZ	ABZSO	ABZSO2	ABZ	ABZSO	ABZSO2	ABZ	ABZSO	ABZSO2	ABZ	ABZSO	ABZSO2	ABZ	ABZSO	ABZSO2	ABZ	ABZSO	ABZSO2
Sample	HPLC (mg/L)	HPLC (mg/L)	HPLC (mg/L)	In medium (ug/ml)	In medium (ug/ml)	In medium (ug/ml)	AV	AV	AV	STDEV	STDEV	STDEV	%	%	%	% Average	% Average	% Average	STDEV	STDEV	STDEV
Control 1 t0	1.592	0	0	3.184	0	0	3.378	0	0	0.274357	0	0	94.257	0	0	100	0	0	8.12189	0	0
Control 2 t0	1.786	0	0	3.572	0	0							105.743	0	0
Control 1 t7	1.661	0	0	3.322	0	0	3.313	0	0	0.0127279	0	0	98.3422	0	0	98.0758	0	0	0.376789	0	0
Control 2 t7	1.652	0	0	3.304	0	0							97.8094	0	0
COLONY 1 t7	0.907	0.304	0.07	1.814	0.608	0.14							53.7004	17.9988	4.14446
COLONY 2 t7	0.831	0.108	0.092	1.662	0.216	0.184							49.2007	6.39432	5.44701
COLONY 3 t7	1.314	0.256	0.097	2.628	0.512	0.194							77.7975	15.1569	5.74304
COLONY 4 t7	1.287	0.159	0.074	2.574	0.318	0.148							76.1989	9.41385	4.38129
COLONY 5 t7	1.145	0.201	0.066	2.29	0.402	0.132							67.7916	11.9005	3.90764
COLONY 6 t7	0.887	0.357	0.079	1.774	0.714	0.158							52.5163	21.1368	4.67732
COLONY 7 t7	1.036	0.316	0.096	2.072	0.632	0.192							61.3381	18.7093	5.68384
COLONY 8 t7	1.097	0.197	0.101	2.194	0.394	0.202							64.9497	11.6637	5.97987
COLONY 9 t7	0.942	0.358	0.094	1.884	0.716	0.188							55.7726	21.196	5.56542
COLONY 10 t7	1.187	0.212	0.055	2.374	0.424	0.11							70.2783	12.5518	3.25636
COLONY 11 t7	1.061	0.267	0.103	2.122	0.534	0.206							62.8182	15.8082	6.09828
COLONY 12 t7	1.387	0.126	0.031	2.774	0.252	0.062							82.1196	7.46004	1.83541

## Sheet: 2nd cultivation
	ABZ	ABZSO	ABZSO2	ABZ	ABZSO	ABZSO2	ABZ	ABZSO	ABZSO2	ABZ	ABZSO	ABZSO2	ABZ	ABZSO	ABZSO2	ABZ	ABZSO	ABZSO2	ABZ	ABZSO	ABZSO2
Sample	HPLC (mg/L)	HPLC (mg/L)	HPLC (mg/L)	In medium (ug/ml)	In medium (ug/ml)	In medium (ug/ml)	AV	AV	AV	STDEV	STDEV	STDEV	%	%	%	% Average	% Average	% Average	STDEV	STDEV	STDEV
Control 1 t0	2.177	0	0	4.354	0	0	4.531	0	0	0.250316	0	0	96	0	0	99.9532	0	0	5.59068	0	0
Control 2 t0	2.354	0	0	4.708	0	0							103.906	0	0
Control 1 t7	1.993	0.105	0	3.986	0.21	0	3.907	0.207	0	0.111723	0.00424264	0	87.9718	4.63474	0	86.2282	4.56853	0	2.46574	0.0936359	0
Control 2 t7	1.914	0.102	0	3.828	0.204	0							84.4847	4.50232	0
COLONY 1 t7	1.615	0.11	0	3.23	0.22	0							71.2867	4.85544	0
COLONY 2 t7	1.036	0.113	0	2.072	0.226	0							45.7294	4.98786	0
COLONY 6 t7	1.254	0.125	0	2.508	0.25	0							55.352	5.51755	0
COLONY 9 t7	1.991	0.106	0.018	3.982	0.212	0.036							87.8835	4.67888	0.794527
