# Supplementary material for: Isolation of soil bacteria able to degrade the anthelminthic compound albendazole
Source: PeerJ. 2023 Nov 6;11:e16127. doi: 10.7717/peerj.16127 (PMC10634332; doi:10.7717/peerj.16127)
Supplement: Supplemental Information 3 [file peerj-11-16127-s003.xlsx]

## Sheet: 1st cultivation
	ABZ	ABZSO	ABZSO2	ABZ	ABZSO	ABZSO2	ABZ	ABZSO	ABZSO2	ABZ	ABZSO	ABZSO2	ABZ	ABZSO	ABZSO2	ABZ	ABZSO	ABZSO2	ABZ	ABZSO	ABZSO2
Sample	HPLC (mg/L)	HPLC (mg/L)	HPLC (mg/L)	In medium (ug/ml)	In medium (ug/ml)	In medium (ug/ml)	AV	AV	AV	STDEV	STDEV	STDEV	%	%	%	% Average	% Average	% Average	STDEV	STDEV	STDEV
Control 1 t0	2.845	0	0	5.69	0	0	5.479	0	0	0.298399	0	0	103.851	0	0	100	0	0	5.44623	0	0
Control 2 t0	2.634	0	0	5.268	0	0							96.1489	0	0
Control 1 t7	1.936	0.43	0	3.872	0.86	0	3.989	0.807	0	0.165463	0.0749533	0	70.6698	15.6963	0	72.8053	14.729	0	3.01995	1.36801	0
Control 2 t7	2.053	0.377	0	4.106	0.754	0							74.9407	13.7616	0
COLONY 1 t7	1.479	0.483	0.222	2.958	0.966	0.444							53.988	17.631	8.10367
COLONY 2 t7	1.113	0.401	0.293	2.226	0.802	0.586							40.6279	14.6377	10.6954
COLONY 3 t7	0.916	0.211	0.296	1.832	0.422	0.592							33.4368	7.70214	10.8049
COLONY 4 t7	1.165	0.421	0.256	2.33	0.842	0.512							42.526	15.3678	9.34477
COLONY 5 t7	1.057	0.2	0.088	2.114	0.4	0.176							38.5837	7.3006	3.21227
COLONY 6 t7	1.344	0.44	0.257	2.688	0.88	0.514							49.06	16.0613	9.38127
COLONY 7 t7	1.126	0.48	0.228	2.252	0.96	0.456							41.1024	17.5214	8.32269
COLONY 8 t7	1.244	0.399	0.304	2.488	0.798	0.608							45.4097	14.5647	11.0969
COLONY 9 t7	1.127	0.354	0.256	2.254	0.708	0.512							41.1389	12.9221	9.34477
COLONY 10 t7	1.114	0.273	0.326	2.228	0.546	0.652							40.6644	9.96532	11.9
COLONY 11 t7	0.84	0.632	0.354	1.68	1.264	0.708							30.6625	23.0699	12.9221
COLONY 12 t7	0.926	0.277	0.184	1.852	0.554	0.368							33.8018	10.1113	6.71655
COLONY 13 t7	0.997	0.524	0.32	1.994	1.048	0.64							36.3935	19.1276	11.681
COLONY 14 t7	1.326	0.394	0.104	2.652	0.788	0.208							48.403	14.3822	3.79631
COLONY 15 t7	1.564	0.256	0.155	3.128	0.512	0.31							57.0907	9.34477	5.65797
COLONY 16 t7	1.731	0.357	0.183	3.462	0.714	0.366							63.1867	13.0316	6.68005
COLONY 17 t7	1.489	0.43	0.189	2.978	0.86	0.378							54.353	15.6963	6.89907
COLONY 18 t7	1.199	0.474	0.33	2.398	0.948	0.66							43.7671	17.3024	12.046
COLONY 19 t7	1.325	0.475	0.242	2.65	0.95	0.484							48.3665	17.3389	8.83373
COLONY 20 t7	1.295	0.566	0.24	2.59	1.132	0.48							47.2714	20.6607	8.76072

## Sheet: 2nd cultivation
	ABZ	ABZSO	ABZSO2	ABZ	ABZSO	ABZSO2	ABZ	ABZSO	ABZSO2	ABZ	ABZSO	ABZSO2	ABZ	ABZSO	ABZSO2	ABZ	ABZSO	ABZSO2	ABZ	ABZSO	ABZSO2
Sample	HPLC (mg/L)	HPLC (mg/L)	HPLC (mg/L)	In medium (ug/ml)	In medium (ug/ml)	In medium (ug/ml)	AV	AV	AV	STDEV	STDEV	STDEV	%	%	%	% Average	% Average	% Average	STDEV	STDEV	STDEV
Control 1 t0	2.585	0	0	5.17	0	0	5.239	0	0	0.0975807	0	0	98.683	0	0	100	0	0	1.86258	0	0
Control 2 t0	2.654	0	0	5.308	0	0							101.317	0	0
Control 1 t7	2.192	0.493	0	4.384	0.986	0	4.312	0.977	0	0.101823	0.0127279	0	83.6801	18.8204	0	82.3058	18.6486	0	1.94357	0.242946	0
Control 2 t7	2.12	0.484	0	4.24	0.968	0							80.9315	18.4768	0
COLONY 3 t7	0.994	0.264	0.025	1.988	0.528	0.05							37.9462	10.0783	0.954381
COLONY 10 t7	1.591	0.372	0.029	3.182	0.744	0.058							60.7368	14.2012	1.10708
COLONY 11 t7	2.103	0.322	0.042	4.206	0.644	0.084							80.2825	12.2924	1.60336
COLONY 12 t7	2.138	0.281	0.02	4.276	0.562	0.04							81.6186	10.7272	0.763504
COLONY 13 t7	0.725	0.281	0.035	1.45	0.562	0.07							27.677	10.7272	1.33613
